# Supplementary material for: Alterations in Vascular Function Associated With the Use of Combustible and Electronic Cigarettes
Source: PubMed Central journal article supplement — J Am Heart Assoc. 2020 Apr 29;9(9):e014570. doi: 10.1161/JAHA.119.014570 (PMC7428567; doi:10.1161/jaha.119.014570), 2020-04-29
Supplement: JAH3-9-e014570-s001.pdf [file JAH3-9-e014570-s001.pdf]

# **SUPPLEMENTAL MATERIAL**

**Table S1. Inclusion and Exclusion Criteria.**

---

|                                                                                                                                                                       |
|-----------------------------------------------------------------------------------------------------------------------------------------------------------------------|
| <b>Inclusion Criteria for Non-Smokers</b>                                                                                                                             |
| No current tobacco product use                                                                                                                                        |
| Smoked <100 cigarettes in their lifetime                                                                                                                              |
| Urinary cotinine level <10 ng/mL                                                                                                                                      |
| <b>Inclusion Criteria for Combustible Cigarette Users</b>                                                                                                             |
| Smoked ≥100 cigarettes in their lifetime                                                                                                                              |
| Current combustible cigarette smoking of ≥ 5 cigarettes/day                                                                                                           |
| <b>Inclusion Criteria for E-Cigarette Users</b>                                                                                                                       |
| No current combustible cigarette smoking for ≥3 months                                                                                                                |
| Current e-cigarette smoking of ≥ 5 days/week                                                                                                                          |
| <b>Inclusion Criteria for Dual Users</b>                                                                                                                              |
| Current e-cigarette smoking of ≥ 5 days/week                                                                                                                          |
| Current traditional cigarette smoking of ≥ 5 cigarettes/day                                                                                                           |
| Smoked ≥100 cigarettes in their lifetime                                                                                                                              |
| <b>Exclusion Criteria for All Study Participants</b>                                                                                                                  |
| No history of diabetes, hypertension, or cardiovascular disease. Fasting blood sugar <100 mg/dL, LDL<130mg/dL, triglycerides <150 mg/dL, blood pressure <140/90 mmHg. |
| Clinically evident major illness, including cancer, end-stage renal disease, hepatic failure.                                                                         |
| Women who are lactating or pregnant. Pregnancy will be excluded by a urine pregnancy test.                                                                            |

---
